# Supplementary material for: Comparative analysis of humoral immune responses and pathologies of BALB/c and C57BL/6 wildtype mice experimentally infected with a highly virulent Rodentibacter pneumotropicus (Pasteurella pneumotropica) strain
Source: PubMed Central journal article supplement (PMC5977748; doi:10.1186/s12866-018-1186-8), 2018-05-30
Supplement: 12866_2018_1186_MOESM1_ESM.pdf [file 12866_2018_1186_MOESM1_ESM.pdf]

**Table S1** Scoring of semiquantitative bacteriological findings in *R. pneumotropicus* infected mice of the indicated strains succumbing to infection within the first week

| strain  | No.  | brain | lung | lymph node | liver | spleen | kidney | genito-urinary tract | total score |
|---------|------|-------|------|------------|-------|--------|--------|----------------------|-------------|
| BALB/c  | 714  | 3     | 3    | 3          | 3     | 0      | 0      | 0                    | 12          |
|         | 719  | 2     | 3    | 3          | 2     | 0      | 1      | 0                    | 11          |
|         | 720  | 1     | 3    | 3          | 3     | 0      | 0      | 0                    | 10          |
|         | 721  | 2     | 2    | 3          | 1     | 0      | 0      | 2                    | 10          |
|         | 722  | 0     | 2    | 3          | 2     | 2      | 1      | 3                    | 13          |
|         | 725  | 1     | 0    | 3          | 2     | 0      | 0      | 0                    | 6           |
|         | 727  | 2     | 3    | 3          | 2     | 0      | 0      | 3                    | 13          |
|         | 729  | 2     | 2    | 3          | 2     | 0      | 1      | 2                    | 12          |
|         | 731  | 3     | 3    | 3          | 3     | 2      | 0      | 3                    | 17          |
| C57BL/6 | 1748 | 1     | 1    | 2          | 0     | 0      | 0      | 1                    | 5           |
|         | 1753 | 1     | 2    | 1          | 0     | 0      | 0      | 1                    | 5           |
|         | 1754 | 2     | 2    | 2          | 0     | 0      | 0      | 0                    | 6           |
|         | 1755 | 2     | 2    | 1          | 0     | 0      | 0      | 0                    | 5           |
|         | 1756 | 0     | 3    | 2          | 1     | 0      | 1      | 0                    | 7           |
|         | 1758 | 1     | 1    | 0          | 0     | 0      | 0      | 2                    | 4           |
|         | 1761 | 1     | 2    | 3          | 1     | 0      | 0      | 0                    | 7           |
|         | 1764 | 1     | 2    | 1          | 2     | 1      | 2      | 1                    | 10          |

Early losses of BALB/c and C57BL/6 mice had mean total scores of 11.6 (SD 3.0) and 6.1 (SD 1.9), respectively, and these differences were significant ( $p = 0.0027$ ). Low, middle and high grades of detection of typical colonies received scores of 1, 2 and 3, respectively.
