# Supplementary material for: Comparative analysis of humoral immune responses and pathologies of BALB/c and C57BL/6 wildtype mice experimentally infected with a highly virulent Rodentibacter pneumotropicus (Pasteurella pneumotropica) strain
Source: PubMed Central journal article supplement (PMC5977748; doi:10.1186/s12866-018-1186-8), 2018-05-30
Supplement: 12866_2018_1186_MOESM2_ESM.pdf [file 12866_2018_1186_MOESM2_ESM.pdf]

**Table S2** Scoring of semiquantitative bacteriological findings in *R. pneumotropicus* infected mice of the indicated strains surviving until the end of the observation period (4 weeks)

| strain  | No.  | brain | lung | lymph node | liver | spleen | kidney | genito-urinary tract | total score |
|---------|------|-------|------|------------|-------|--------|--------|----------------------|-------------|
| BALB/c  | 715  | 1     | 1    | 0          | 1     | 0      | 2      | 3                    | 8           |
|         | 716  | 0     | 2    | 1          | 1     | 0      | 0      | 0                    | 4           |
|         | 717  | 1     | 2    | 3          | 0     | 0      | 0      | 0                    | 6           |
|         | 724  | 0     | 2    | 2          | 0     | 0      | 0      | 0                    | 4           |
|         | 726  | 0     | 2    | 0          | 0     | 0      | 0      | 0                    | 2           |
|         | 730  | 0     | 3    | 3          | 0     | 0      | 0      | 0                    | 6           |
|         | 732  | 0     | 2    | 2          | 2     | 0      | 1      | 3                    | 10          |
| C57BL/6 | 1749 | 1     | 1    | 0          | 2     | 0      | 3      | 3                    | 10          |
|         | 1750 | 0     | 0    | 0          | 0     | 0      | 0      | 0                    | 0           |
|         | 1751 | 0     | 1    | 0          | 0     | 0      | 0      | 3                    | 4           |
|         | 1759 | 0     | 1    | 1          | 0     | 0      | 0      | 0                    | 2           |
|         | 1760 | 0     | 1    | 0          | 0     | 0      | 0      | 1                    | 2           |
|         | 1763 | 0     | 0    | 1          | 0     | 0      | 0      | 0                    | 1           |
|         | 1765 | 0     | 0    | 0          | 0     | 0      | 0      | 0                    | 0           |
|         | 1766 | 0     | 0    | 0          | 0     | 0      | 0      | 0                    | 0           |

Surviving BALB/c and C57BL/6 had mean total scores of 5.7 (SD 2.7) and 2.4 (SD 3.4), respectively, and these differences were significant ( $p = 0.036$ ). Low, middle and high grades of detection of typical colonies received scores of 1, 2 and 3, respectively.
