# Supplementary material for: Comparative analysis of humoral immune responses and pathologies of BALB/c and C57BL/6 wildtype mice experimentally infected with a highly virulent Rodentibacter pneumotropicus (Pasteurella pneumotropica) strain
Source: PubMed Central journal article supplement (PMC5977748; doi:10.1186/s12866-018-1186-8), 2018-05-30
Supplement: 12866_2018_1186_MOESM3_ESM.pdf [file 12866_2018_1186_MOESM3_ESM.pdf]

**Table S3** *R. pneumotropicus* and *R. heyltii* strains used in this study

| Species                  | Strains                                                                                                                                                             | Reference                                                                        |
|--------------------------|---------------------------------------------------------------------------------------------------------------------------------------------------------------------|----------------------------------------------------------------------------------|
| <i>R. pneumotropicus</i> | ATCC 35149                                                                                                                                                          | DSMZ                                                                             |
|                          | JF4Ni/15                                                                                                                                                            | Institute for Bacteriology and Mycology, Faculty of Veterinary Medicine, Leipzig |
|                          | JF10GVG/16, JF17GVG/16, JF18GVG/16, JF21GVG/17, JF22GVG/17, JF23GVG/17, JF24GVG/17, JF25GVG/17                                                                      | GVG Diagnostics GmbH                                                             |
|                          | 1596/07, 217/08, 607/10, 567/11, 665/11, 691/11, 695/11, 847/11, 1009/11, 1012/11, 1023/11, 394/12, 1526/12, 1528/12, 1550/12, 530/13                               | Benga <i>et al.</i> (2012) [34], Benga <i>et al.</i> (2013) [6]                  |
| <i>R. heyltii</i>        | JF1Fe/16, JF19GVG/16, JF20GVG/16, JF26GVG/17, JF27GVG/17                                                                                                            | GVG Diagnostics GmbH                                                             |
|                          | 218/08, 314/08, 520/08, 1825/08, 450/10, 256/11, 490/11, 543/11, 566/11, 568/11, 622/11, 666/11, 693/11, 696/11, 705/11, 1070/11, 1527/12, 1528/12, 1552/12, 526/13 | Benga <i>et al.</i> (2012) [35], Benga <i>et al.</i> (2013) [6]                  |
