# Supplementary material for: Comparative analysis of humoral immune responses and pathologies of BALB/c and C57BL/6 wildtype mice experimentally infected with a highly virulent Rodentibacter pneumotropicus (Pasteurella pneumotropica) strain
Source: PubMed Central journal article supplement (PMC5977748; doi:10.1186/s12866-018-1186-8), 2018-05-30
Supplement: 12866_2018_1186_MOESM4_ESM.pdf [file 12866_2018_1186_MOESM4_ESM.pdf]

**Table S4** Scoring of clinical signs in mice infected with *R. pneumotropicus*

| <b>Parameters</b> | <b>0</b>                 | <b>1</b>                  | <b>2</b>                            |
|-------------------|--------------------------|---------------------------|-------------------------------------|
| body weight       | steady or increase       | ≥5% decrease              | ≥20% decrease                       |
| coat              | smooth, fitting, shining | rough, decreased grooming | ruffled, no grooming                |
| breathing         | normal, rhythmic         | fast, superficial         | fast, abdominal                     |
| dehydration       | normal skin elasticity   | degraded skin elasticity  | persisting skin fold, caved in eyes |
| posture           | normal                   | bended back               | cowering                            |
| eyes              | normal                   | tweak, discharge          | caved in                            |
| behaviour         | normal, active, curious  | depression                | apathy, isolation from group        |
| motion            | no anomaly               | incoordination            | apraxia, tumbling                   |
