# Supplementary material for: Comparative analysis of humoral immune responses and pathologies of BALB/c and C57BL/6 wildtype mice experimentally infected with a highly virulent Rodentibacter pneumotropicus (Pasteurella pneumotropica) strain
Source: PubMed Central journal article supplement (PMC5977748; doi:10.1186/s12866-018-1186-8), 2018-05-30
Supplement: 12866_2018_1186_MOESM5_ESM.pdf [file 12866_2018_1186_MOESM5_ESM.pdf]

**Table S5** Scoring of catarrhal - purulent inflammations in mice infected with *R. pneumotropicus*

|                                                         | <b>Score</b> |
|---------------------------------------------------------|--------------|
| mild, focal                                             | 1            |
| mild, multifocal or diffuse                             | 2            |
| mild to moderate, focal                                 | 2            |
| mild to moderate, multifocal or diffuse                 | 3            |
| moderate, focal                                         | 3            |
| moderate, multifocal or diffuse                         | 4            |
| mild, focal with necrosis                               | 4            |
| moderate to severe, multifocal or diffuse               | 5            |
| moderate to severe, multifocal or diffuse with necrosis | 5            |
| severe, multifocal or diffuse                           | 6            |
| severe, focal with necrosis                             | 6            |
| moderate to severe, multifocal or diffuse with necrosis | 6            |
| severe, multifocal or diffuse with necrosis             | 7            |
