# Supplementary material for: Comparative analysis of humoral immune responses and pathologies of BALB/c and C57BL/6 wildtype mice experimentally infected with a highly virulent Rodentibacter pneumotropicus (Pasteurella pneumotropica) strain
Source: PubMed Central journal article supplement (PMC5977748; doi:10.1186/s12866-018-1186-8), 2018-05-30
Supplement: 12866_2018_1186_MOESM6_ESM.pdf [file 12866_2018_1186_MOESM6_ESM.pdf]

**Table S6** Oligonucleotide primers used in this study

| <b>Primer</b>   | <b>Oligonucleotide sequence (5'-3')</b> | <b>Target</b>  |
|-----------------|-----------------------------------------|----------------|
| <i>pnxIAF</i>   | TATTAACCCGGGACTGAATATTTAGATGAAAT        | <i>pnxIA</i>   |
| <i>pnxIAR</i>   | TATTAACCTCGAGTAATATAGATTGATAATTAG       | <i>pnxIA</i>   |
| <i>pnxIIAF</i>  | TAATATCCCGGGACTTTTCTCCATATTATTAA        | <i>pnxIIA</i>  |
| <i>pnxIIAR</i>  | TATGTGCTCGAGAATAATCTCATATTGGCTTT        | <i>pnxIIA</i>  |
| <i>pnxIIIF</i>  | CAGGATGCGGCCGCTTCGACTACATTA AAAAGTAT    | <i>pnxIIIA</i> |
| <i>pnxIIARs</i> | CTGTTACTGTATCACCTGCTTTG                 | <i>pnxIIIA</i> |
